# Supplementary material for: Resistive switching behaviors and memory logic functions in single MnOx nanorod modulated by moisture
Source: Royal Society of Chemistry journal article supplement (doi:10.1039/c9cc04069b), 2019-01-01
Supplement: c9cc04069b1.pdf [file c9cc04069b1.pdf]

## Electronic Supporting Information

### Resistive switching behaviors and memory logic functions in single $\text{MnO}_x$ nanorod modulated by moisture†

Guangdong Zhou,<sup>\*,†,a,b</sup> Bai Sun,<sup>‡,d</sup> Zhijun Ren,<sup>‡,a</sup> Lidan Wang,<sup>‡,d</sup> Cunyun Xu,<sup>b</sup> Bo Wu,<sup>c</sup> Ping Li,<sup>c</sup> Yanqing Yao<sup>b</sup> and Shukai Duan<sup>\*,b</sup>

<sup>a</sup> School of Science, Guizhou institute of Technology, Guiyang 55003, China.

<sup>b</sup> School of Artificial Intelligence, Southwest University, Chongqing 400715, China.

<sup>c</sup> School of Physics and Electronic science, Zunyi Normal College, 563002, China.

<sup>d</sup> School of Physical Science and Technology, Southwest Jiaotong University, Chengdu, Sichuan 610031, China.

<sup>†</sup> The Authors equally contribute to this work.

Email: zhougd@swu.edu.cn, gdzhou132@163.com, duansk@swu.edu.cn

Tel: 086-185-8541-3032

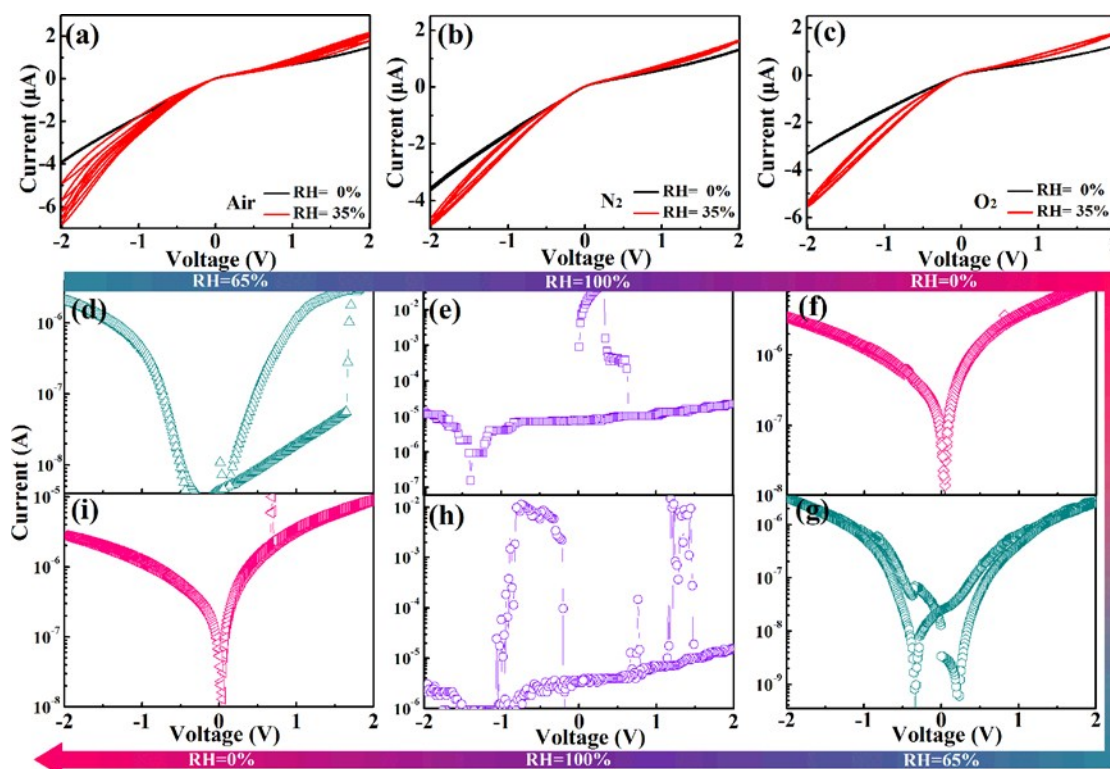

**Fig. S1** Moisture-dependency of RS behaviors in (a) air amiben, (b)  $\text{N}_2$  and (c)  $\text{O}_2$  atmosphere. The RS behavior under different RH levels: (d), (g) The humidified synthetic air with RH of 65%; (e), (h) The humidified synthetic air with the RH level of 100% and (f), (i) the dry air with the RH level of 0%. One can see that the reversion between resistor and memristor is reversible, despite the RS behaviors are not so stable.

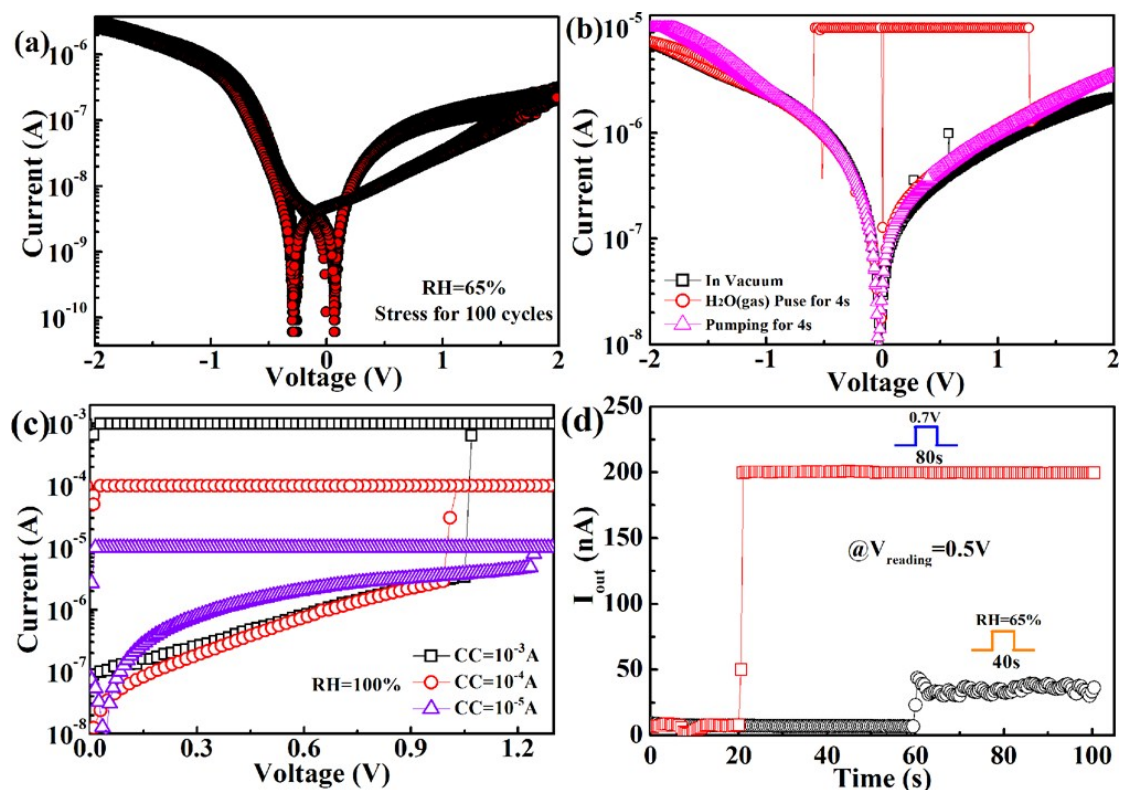

**Fig. S2** (a) Cycling endurance of RS behavior for the device in RH of 65%. (b) Reversing between resistor and memristor under vacuum and moisture ambient. (c) Compliance current dependency of the RS behavior under RH of 100%. (d) Current *versus* time relations for the input pulse of 0.7 V for 80s and the RH of 65% for 40s.

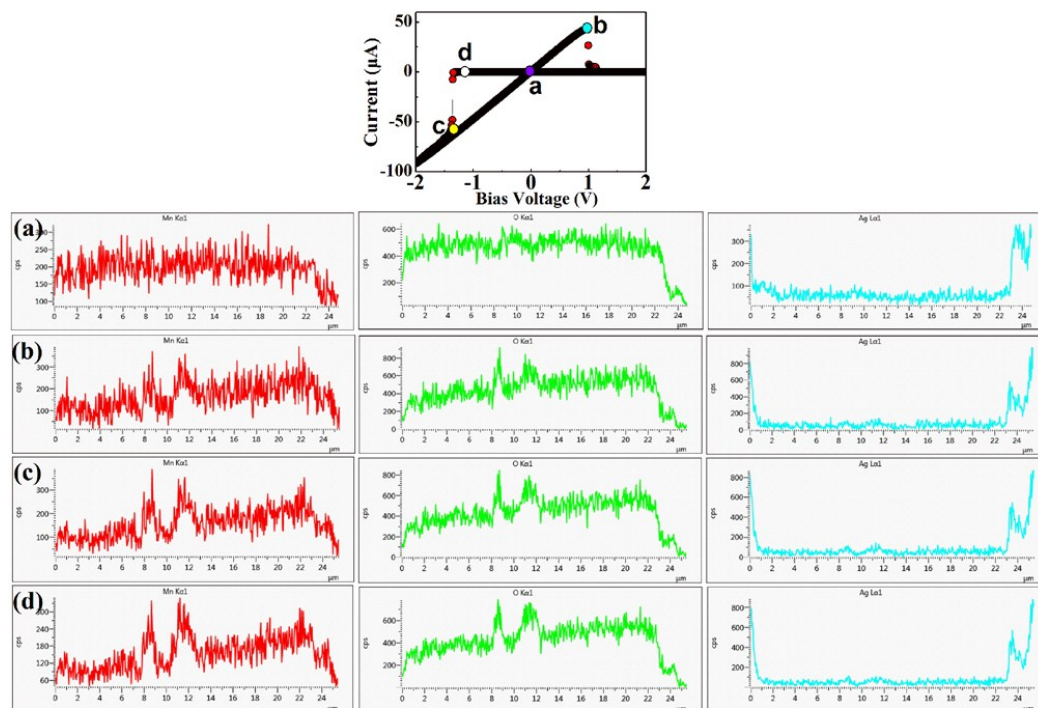

**Fig. S3** EDX spectra of the nanomicro wire of MnO<sub>x</sub>-based lateral device under different RS states: (a) Initial HRS state; (b) SET; (c) RESET and (d) Switching back to HRS.

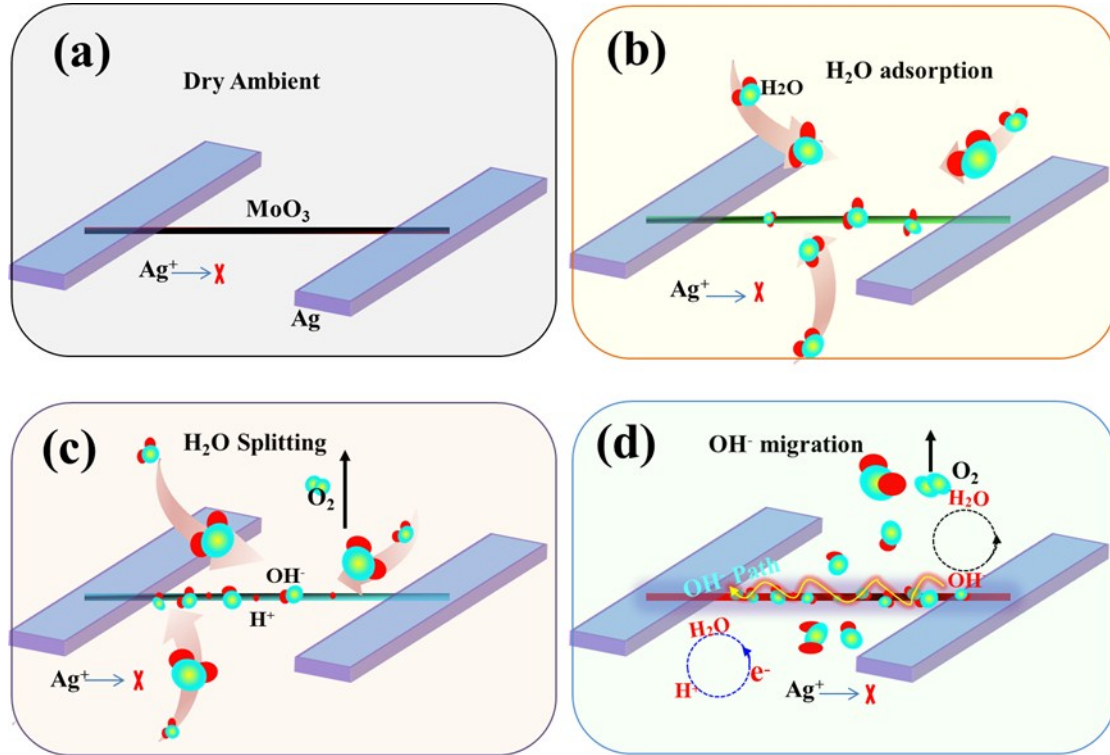

**Fig. S4** Physical mechanism is proposed to comprehend the reversion between resistor and memristor. (a) The device presents in dry ambient. (b)  $\text{H}_2\text{O}$  molecule adsorption on the surface of the  $\text{MnO}_x$  nanorod. (c)  $\text{H}_2\text{O}$  molecule splitting process due to the  $\text{H}_2\text{O}$  redox reaction with surface oxygen vacancy. (d) Massive  $\text{OH}^-$  ion suspends on the surface of the  $\text{MnO}_x$  nanorod and then migrates along the surface to form conduction paths.

### Experimental Details

***MnO<sub>x</sub> nano-micro rod synthesis.*** Hydrothermal method is employed to synthesis the  $\text{MnO}_x$  nanorod. 0.5 g  $\text{Mn}(\text{NO}_3)_2 \cdot 4\text{H}_2\text{O}$  and 0.05 g NaOH are dissolved into 25 mL deionized water and continuously stirs for 24 hours at room temperature to form precursor solution. The precursor solution is transferred into teflon-lined steel autoclave, which is heated at  $200^\circ\text{C}$  for 18 hours. After that, the  $\text{MnO}_x$  nanorod and fragments are formed in the post hydrothermal reaction solutions. The  $\text{MnO}_x$  nanorod can be finally obtained after centrifugal separated using deionized water for 4 times.

***Lateral device fabrication.*** The 0.003g  $\text{MnO}_x$  nanorod is diluted into 50 mL deionized water. The dilute solution of 1.0  $\mu\text{L}$  is spin coated on the surface of  $\text{Si}/\text{SiO}_2$  substrate at 6000 rpm for 60 seconds. Then, the single  $\text{MnO}_x$  nanorod is mechanically selected using the Pt probe. After that, electragol is dropped into the both ends of single  $\text{MnO}_x$  nanorod.

***Moisture levels controlling.*** Air ambient of laboratory of relative humidity(RH) is  $35\% \pm 3\%$ . The RH of 0% can be obtained by pumping the probe station to  $5 \times 10^{-4}$  Pa and then injecting the dry air (20%  $\text{O}_2$ , 80%  $\text{N}_2$ ,  $\text{H}_2\text{O} < 5$  ppm), which is viable by flowing air through three interconnected heated-glass

delivery tubes filled with dry calcium oxide powers. The moist ambient with RH of  $65\% \pm 5\%$  or and  $95\% \pm 5\%$  is achieved by passing the laboratorial air through a gas-washing bottle filled with deionized water. A min-hygrometer is employed to detect the humidity levels.

*Structural characterization and I-V measurement.* Surface morphology and chemical component are characterized field emission scanning electron microscope(FE-SEM, JSM-6510) and X-ray photoelectron spectroscopy(XPS, 250Xi), respectively. Test system consisted by the electrochemical analyzer (CHI, 660D) and Lake Shore probe station(TTPX) are employed to conduct the I-V measurement.
